1 **Effects of agricultural systems on the anuran diversity in the Colombian**  
2 **amazon**

3  
4 **Juan C. Diaz-Ricaurte<sup>1,2,4\*</sup>, Nayra Camila Arriaga-Villegas<sup>3</sup>, Juan David López-**  
5 **Coronado<sup>3</sup>, Gina Ximena Macias- Garzón<sup>3</sup>, Bruno F. Fiorillo<sup>1,4</sup>**

6  
7 *<sup>1</sup>Laboratório de Ecologia, Evolução e Conservação de Anfíbios e Répteis, Departamento de*  
8 *Ecologia, Instituto de Biociências, Universidade de São Paulo, Rua do Matão, 05508-090*  
9 *São Paulo, SP, Brasil.*

10 *<sup>2</sup>Grupo de Investigación en Biodiversidad y Desarrollo Amazónico (BYDA), Programa de*  
11 *Biología, Facultad de Ciencias Básicas, Universidad de la Amazonía, Florencia, Caquetá,*  
12 *Colombia.*

13 *<sup>3</sup>Universidad de la Amazonía, Facultad de Ciencias Básicas, Programa de Biología,*  
14 *Florencia, Caquetá.*

15 *<sup>4</sup>Escola Superior de Agricultura Luiz de Queiroz, Programa de Pós Graduação em Ecologia*  
16 *Aplicada, Universidade de São Paulo, Piracicaba, SP, Brazil.*

17  
18 \* Corresponding author. E-mail: [juan.diaz@usp.br](mailto:juan.diaz@usp.br)

19

## 20 **Abstract**

21 We provide information on the diversity of anurans from agroforestry systems in the  
22 Colombian Amazon. This area is inserted at the tropical rainforest ecosystem and consists  
23 mainly of secondary forest remnants surrounded by crops, grasslands, and agroforestry  
24 systems. From February to May 2015, we sampled anurans mainly with visual and auditory  
25 surveys. We recorded a total of 1096 individuals of 20 species of anurans from six families  
26 at the study area. The relictual forest was the richest environment, followed by Achapo and  
27 Cacao agroforestry systems. The Achapo system showed great similarity in species  
28 composition with relictual forest, however, the latter presented the highest number of  
29 exclusive species, whereas the first presented only two and Cacao system didn't have any  
30 exclusive species. Our results show that the richness can vary between the different types of  
31 agroforestry systems and highlight their importance as management tool for anurans  
32 conservation in the Colombian Amazon.

33

34 **Keywords:** Agricultural landscapes, conservation, frogs, human-modified landscapes,  
35 habitat use.

36

37

## 38 **Introduction**

39 Deforestation and consequent loss of biodiversity have considerably increased throughout  
40 the world in the last decades (Myers et al. 2000; Hansen et al. 2010, 2013). Such anthropic  
41 disturbances aim mostly to provide a proper structure for croplands (e.g. Lavelle et al. 1992,  
42 Mboukou-Kimbatsa et al. 1998; Barros et al. 2002). In this way, ecological studies in

43 human-modified landscapes are extremely relevant for a major understanding of these  
44 environments as well as promoting more sustainable practices (Chazdon et al. 2009). The  
45 establishment of the agroforestry system is an alternative way for the traditional agriculture  
46 system that intends balancing agricultural development and natural landscapes' maintenance  
47 (Izac & Sanchez 2001). Moreover, it enhances the exchange between habitat remnants  
48 (Asare et al. 2014).

49

50 Although to reduce deforestation successfully, agroforestry depends largely on local  
51 features (e.g. social and technological issues), profitability and demand of what is being  
52 produced (Angelsen & Kaimowitz, 2004), some studies have shown that shaded Cacao  
53 (*Theobroma cacao*) contributes to slow down the deforestation (Ruf & Schroth 2004).  
54 Moreover, this system usually presents a greater diversity of both plant and animal (Argôlo  
55 2004; Schroth & Harvey 2007; Teixeira et al. 2015) than other agricultural land uses  
56 (Schroth & Harvey 2007). The same has been found for shaded coffee plantations, which can  
57 harbor a wide variety of animals, including birds, bats, and other mammals, insects, and  
58 reptiles (Somarriba et al. 2004). Despite those evidences, there is a few number of studies  
59 comparing agro-forests with other types of disturbed landscapes (Schroth & Harvey 2007).

60

61 Anurans are highly affected by habitat loss and fragmentation (mainly due to risky  
62 breeding migrations; Becker et al. 2007). In terms of land use, some systems may lead to a  
63 decrease in populations resilience and to increase extinction risks, particularly for habitat  
64 specialists (Yandi et al. 2016, Fiorillo et al. 2018). Although some species can benefit from  
65 man-made structures such as artificial water bodies, since they provide potential sites for  
66 refuge and reproduction (Brand & Snodgrass 2010; Fiorillo et al. 2019) it does not prevent

67 that intrinsic features of disturbed habitats will affect the abundance and temporal  
68 distribution (Silva & Rossa-Feres 2011) likewise richness and composition (Wanger et al.  
69 2010; Fiorillo et al. 2018) of anuran communities.

70

71 Piedmont region is situated located at the transition zone between the Andes  
72 mountain range and the Amazon basin, presenting high levels of biodiversity. Nevertheless,  
73 it has been the target of human settlements and thus, consequent landscape changes (Myers  
74 et al. 2000; Ricaurte et al. 2014). Considering that most amphibian species are affected in  
75 some way by habitat fragmentation and other types of disturbing, the aim of the present  
76 study was to assess the variation in anurans diversity at different agroforestry structures.

77

## 78 **Materials and methods**

### 79 *Study area*

80 The present study was carried out at the Amazonian Research Center Macagual - Cesar  
81 Augusto Estrada González of University of the Amazon (380 ha). It is located at 20 km from  
82 the municipality of Florencia, south of the Department of Caquetá, Colombia, (1.616667,  
83 75.61; Datum WGS84; 300 m a.s.l; Figure 1). The mean precipitation is 3793 mm and mean  
84 annual temperature is 25.5 °C. The area is inserted at the tropical rainforest ecosystem and  
85 consists mainly of secondary forest remnants surrounded by crops, grasslands, and  
86 agroforestry systems (see below). In addition, the area remains temporarily flooded during  
87 the rainy season, a feature that partially determines the vegetation cover (Arriaga-Villegas et  
88 al. 2014). We sampled three types of agroforestry systems with different levels of  
89 complexity (vertical stratification, amount of vegetation's cover and floristic richness and  
90 productivity (Table 1). In these sites, the floristic composition varies from timber to fruit

91 species from the families Fabaceae, Melastomataceae, Lauraceae, Sapotaceae, Moraceae,  
92 Myristicaceae, with low presence of stubble or open areas (authors, *pers. obs*).

93

#### 94 ***Sampling***

95 Data were gathered by four researchers along 8 days per month, from February to May 2015,  
96 for a total sample of 33 field trips and 26 days. At each agroforestry system, three quadrants  
97 of 70 x 20 m were randomly distributed. Within those quadrants we performed visual  
98 searches during the day (0700-1200h) and at night (19:00 - 24:00 h), totalizing a sampling  
99 effort of 99 person-hours of visual search. All individuals found were counted, identified and  
100 released.

101

#### 102 ***Data analysis***

103 Sampling sufficiency for the different agroforestry systems was estimated through sampling  
104 coverage analysis, performed on the virtual platform iNEXT (Chao et al. 2016). This method  
105 prevents potential biases, caused by differences in species composition and/or in sampling  
106 effort of traditional species accumulation curves by random sampling. To provide the species  
107 composition and abundance distribution in all agroforestry systems we constructed a Venn  
108 diagram and abundance diagram (containing the total number of individuals observed in the  
109 field). A modification was made in the abundance diagram to include the total number of  
110 individuals captured of the species *Ameerega hahneli* (which presented a much larger  
111 number of individuals than the other species). Regarding the relative abundance of the  
112 species they were classified as abundant (more than 30 individuals found), of intermediate  
113 abundance (between 20 and 30 individuals), and rare (less than 10 individuals). To compare

114 the species abundance from different agroforestry systems we performed a principal  
115 coordinates analysis (PCoA), using the Bray-Curtis' similarity coefficient, and a cluster  
116 analysis, using the Simple Matching Coefficient as a measure of similarity and the Pair  
117 Group Average Method (UPGMA) as the clustering method (Sneath & Sokal 1973; Manly  
118 1994). This analysis is useful in situations where there are more variables (species) than  
119 cases (assemblages; Sawaya et al. 2008).

120

## 121 **Results**

122 A total of 1096 individuals of 20 species of anurans from six families were recorded in the  
123 study area (Table 2). Any of those is currently classified as threatened according to  
124 International Union for Conservation of Nature (IUCN), Colombian's red list and literature  
125 (e.g. Acosta-Galvis 2000; Rueda-Almonacid et al. 2004). Most species were found in the  
126 relictual forest (RF), followed by Achapo (15 species) and Cacao (11 species) systems.  
127 Dendrobatidae was the most abundant family (500 individuals from a single species, *A.*  
128 *hahneli*), followed by the Leptodactylidae (252 individuals from six species) and  
129 Craugastoridae (22 individuals from two species) (Figure 2A). The Families with greatest  
130 species richness were Hylidae (seven species) and Leptodactylidae (six species), followed by  
131 Bufonidae (three species), Craugastoridae (two species), Aromobatidae and Dendrobatidae  
132 (each one with a single species; Table 2).

133

134 The species richness of Achapo and RF was similar, varying from 15 to 18 species  
135 respectively. We found all species of the study area in these two environments, where *L.*  
136 *leptodactyloides* and *L. pentadactylus* were exclusive from Achapo, while *P. conspicillatus*,  
137 *P. altamazonicus*, *B. punctata* and *O. planiceps*, were exclusive from RF. However, despite

138 of most species had been found at both, they presented great contrast in terms of abundance  
139 (Figure 2B). The species *D. parviceps* was almost exclusively found in Achapo (more than  
140 98% of individuals) showing high affinity for this type of agroforestry system. Only nine  
141 species shared all the three systems, whereas three species were common in RF and Achapo  
142 (*D. parviceps*, *B. cinerascens*, *B. lanciformis*), one in Achapo and Cacao (*S. ruber*) and one  
143 in Relictual forest and Cacao (*R. marina*). The system with the highest number of exclusive  
144 species was the RF (*P. altamazonicus*, *P. conspicillatus*, *O. planiceps*, *B. punctata*), whereas  
145 only two species were exclusive of Achapo (*L. leptodactyloides* and *L. pentadactylus*) and  
146 none was exclusive in Cacao.

147

148 The sampling coverage analysis indicates that our sampling effort was enough to  
149 sample nearly all species that occur in the region, as well as in each system (Figure 3).  
150 Sampling in the different systems reached coverage of 0.97 in the forest, 0.97 in the Cacao  
151 and 0.99 in the Achapo (Figure 4).

152

153 The first two axes of the Principal Coordinate Analysis (PCoA; Figure 5) together  
154 explained 46.95 % of the total data variance (axis 1: eigenvalue = 1.69 and 23.36 % of  
155 variance; axis 2: eigenvalue = 1.51 and 23.59 % of variance). The PCoA axis 1 ordinated  
156 species associated with the RF from those associated to Achapo, where generalist species  
157 (including those found at the Cacao system) remained at the center. The PCoA axis 2  
158 ordinated rare and abundant species (Figure 5).

159

160

161 **Discussion**

162 **We found a higher species richness of anurans in RF, followed by Achapo and Cacao,**  
163 **the former with the largest number of exclusive species. The Achapo system is**  
164 **composed by timber and fruit species and presents small flooded areas which might**  
165 **provide a variety of microhabitats, food, shelter and potential breeding sites for**  
166 **anurans and other animals. Furthermore, local climatic conditions are known to be**  
167 **correlated with anurans diversity, what can be related to their eco-physiological**  
168 **constraints (Valdujo et al. 2013). Some studies have shown that the shading and variety**  
169 **of soil types in agroforestry systems affect local climatic conditions (Lin 2007). This**  
170 **suggests that features related to system structure, such as vertical stratification can**  
171 **indirectly affect anurans diversity.**

172

173 The Cacao system was the wettest site and presented the greatest degree of anthropic  
174 disturbance (near built areas). According to that, the most abundant species in this  
175 environment was *L. mystaceus* which is considered a generalist species, known by its great  
176 capacity to adapt to altered habitats (Heyer & Bellin 1973; IUCN 2015). Although *S. ruber* is  
177 relatively rare (N = 11) in the community, it was more abundant at the Cacao System either.  
178 This species is known to occur from open to forested environments and even urban-rural  
179 areas (Duellman 1978; Duellman & Wiens 1993).

180

181 *Ameerega hahneli* was the most abundant species in the three agroforestry systems.

182 This species is primarily terrestrial and inhabits primary and secondary forests. It uses  
183 mainly palm branches and fallen leaves as microhabitats (Carvalho 2011). The Achapo  
184 system was where it the largest number of individuals of this species was found, what may  
185 be due to this system provide a thick leaf-litter layer, favoring species foraging behaviour



186 and reproduction (Rodríguez & Duellman 1994; Haddad & Martins 1994; Duellman 2005;  
187 Lötters and Mutschmann 2007; Vásquez et al. 2013). The same seems to be the case of the  
188 bufonid species *A. minuta* (Miranda et al. 2015; Rojas et al. 2015). The Craugastoridae  
189 family showed the lowest abundance and richness (only 22 individuals of two species at the  
190 community, both exclusive from RF system, see Table 1). This is probably related to the  
191 low capacity of some species to adapt in disturbed environments (Guo 2000; Lips et al.  
192 2005). The Hylidae family was the richest one at the study area (seven species). This family  
193 is considered one of the most diverse among the anurans (Frost 2020) and presents a great  
194 number of reproductive modes associated from the vegetation to floor, reflecting adaptations  
195 toward habitat occupation (e.g. Haddad & Prado 2005). In contrast, Leptodactylids (second  
196 most diverse family of the study area with six species), are frequently associated with the  
197 floor, generally lacking arboreal adaptations (Haddad & Prado 2005). Species of this family  
198 were usually associated to exposed water bodies (temporary or permanent). These  
199 microhabitats are often used by species of this family for reproduction and are common at  
200 the three environments of the study area. These results show how anurans life history from  
201 Department of Caquetá can be determinant regarding their colonization at altered  
202 environments (Rodriguez & Duellman 1994).

203

204 Although no threatened species has been found at the study area, the replacement of  
205 natural forests by agricultural landscapes (e.g. pastures, palm plantations; (Etter et al. 2006;  
206 Garcia-Ulloa et al. 2012), contributes to both extinguish forest specialists (such as *O.*  
207 *planiceps*, *P. altamazonicus*, *P. conspicillatus*, *B. punctata*, and *B. cinerascens*, found  
208 exclusively in relictual forests) as well as to facilitate the occupation by generalist ones  
209 (Marvier et al. 2004). Forest habitats present a great structural complexity (arboreal and  
210 understory remains) which provides a variety of microhabitats (Urbina & Pérez 2002; Jose

211 2012; Palacios et al. 2013). Both Achapo and Cacao seem to work as transition  
212 environments, which arise from forest fragmentation. Fiorillo et al. (2018) found that  
213 anurans diversity from peach palm plantations and secondary forests that surrounded it was  
214 very similar. On the other hand a site of banana plantation from the same study presented  
215 lesser richness than both environments (peach palm plantations and secondary forests) and  
216 none exclusive species. These results are very similar to that showed at the present study and  
217 indicate that anurans diversity of disturbed habitats could be related to the interplay between  
218 populations source (natural landscapes) and intrinsic traits of disturbed habitats (e.g. crops,  
219 agroforestry systems).

220

221 We conclude that the agroforestry systems can be important management tools for  
222 anurans conservation. Their multi-stratified structures are able to provide shelter and suitable  
223 reproductive conditions for a great number of species. However, it is important to have in  
224 mind that, some of those systems can harbor richest communities than others. Additionally,  
225 the effectiveness of biological conservation depends largely on the agricultural matrix and  
226 how it is managed (Perfecto & Vandermeer 2008; Jose 2009). The assessment of landscape  
227 changing on biodiversity and species natural history can be critical for promoting more  
228 sustainable practices.

229

## 230 **Acknowledgements**

231 We thank University of Amazon for allowing our fieldwork at Amazonian Research Center  
232 Macagual - Cesar Augusto Estrada González. We thanks to Maykol Olarte, Ricardo  
233 Rodriguez, Rolland D. Díaz-Morales and Karen Garcia for assistance in field work. This  
234 study was financed in part by the Coordenação de Aperfeiçoamento de Pessoal de Nível

235 Superior – Brasil (CAPES) – Finance Code 001. Finally, we thank Maria Juana Parada  
236 Sierra for the English revision.

237

238 **Disclosure statement:** No potential conflict of interest was reported by the authors.

239 **Author contributions:** JCDR planned the study; JCDR, NCAV and JDLC collected the  
240 data; GXMG financed fieldwork; JCDR and BFF analyzed the data; JCDR led the writing of  
241 the manuscript. JCDR wrote the original draft; JCDR and BFF contributed critically to the  
242 manuscript. All authors approved the final version of this manuscript for publication.

243

## 244 **References**

245 **Acosta-Galvis AR. 2000. Ranas, salamandras y caecilias (Tetrapoda:Amphibia) de**  
246 **Colombia. Biota Colomb. 1(3): 289–319.**

247 **Angelsen A, Kaimowitz D. 2004. Is Agroforestry Likely to Reduce Deforestation?**  
248 **In: Agroforestry and Biodiversity Conservation in Tropical Landscapes. Schroth G,**  
249 **da Fonseca GAB, Harvey CA, Gascon C, Vasconcelos HL, Izac AMN, editors.**  
250 **Washington, Island Press. p. 87–106.**

251 **Arriaga-Villegas NC, Obregón-Paz N, Ruiz-Valderrama D. 2014. Diversidad de**  
252 **anuros en humedales del centro de Investigaciones Amazónicas Macagual,**  
253 **Florencia, Caquetá. Biodivers Neotrop. 4(1): 42–48.**

254 **Argôlo AJS. 2004. As serpentes dos cacauais do sudeste da Bahia. Ilhéus: Editus.**  
255 **Editora da UESC.**

- 256 **Asare R, Afari-Sefa V, Osei-Owusu Y, Pabi O. 2014. Cacao agroforestry for**  
257 **increasing forest connectivity in a fragmented landscape in Ghana. *Agrofor Syst.***  
258 **88(6): 1143–1156.**
- 259 **Barros E, Pashanasi B, Constantino R, Lavelle P. 2002. Effects of land-use system**  
260 **on the soil macrofauna in western Brazilian Amazonia. *Biol Fert Soils.* 35(5): 338–**  
261 **347.**
- 262 **Becker CG, Fonseca CR, Haddad CF, Batista RF, Prado PI. 2007. Habitat split and**  
263 **the global decline of amphibians. *Science* 318: 1775–1777.**
- 264 **Brand AB, Snodgrass JW. 2010. Value of artificial habitats for amphibian**  
265 **reproduction in altered landscapes. *Conserv Biol.* 24(1): 295–301.**
- 266 **Carvalho MAOD. 2011. Estratégia e comportamento reprodutivo de *Ameerega***  
267 ***hahneli* (Anura, Dendrobatidae) na Amazônia Central [Master's thesis].**  
268 **[Manaus(AM)]: Instituto Nacional De Pesquisas Da Amazônia - Inpa.**
- 269 **Chazdon RL, Harvey CA, Komar O, Griffith DM, Ferguson BG, Mart G, Nigh R,**  
270 **Soto-Pinto L, van-Breugel M, Philpott SM. 2009. Beyond Reserves: A Research**  
271 **Agenda for Conserving Biodiversity in Human-modified Tropical Landscapes.**  
272 ***Biotropica* 41(2): 142–153.**
- 273 **Chao A, Ma KH, Hsieh TC. 2016. iNEXT (iNterpolation and EXTrapolation)**  
274 **Online: Software for Interpolation and Extrapolation of Species Diversity. Program**  
275 **and User's Guide published at**  
276 **[http://chao.stat.nthu.edu.tw/wordpress/software\\_download/](http://chao.stat.nthu.edu.tw/wordpress/software_download/).**

- 277 **Dinerstein E, Olson D, Joshi A, Vynne C, Burgess ND, Wikramanayake E, Hahn N,**  
278 **Palminteri S, Hedao P, Noss R, et al. 2017. An ecoregion-based approach to**  
279 **protecting half the terrestrial realm. *BioScience*. 67(6): 534–545.**
- 280 **Duellman WE. 1978. The biology of an equatorial herpetofauna in Amazonian**  
281 **Ecuador (Vol. 65). Lawrence: University of Kansas.**
- 282 **Duellman WE. 2005. Cusco Amazónico. Comstock Pub. Associates.**
- 283 **Duellman WE, Wiens JJ. 1993. Hylid frogs of the genus *Scinax* Wagler, 1830, in**  
284 **Amazonian Ecuador and Peru. *Occas pap Mus Nat Hist*. 153: 1–57.**
- 285 **Etter A, McAlpine C, Wilson K, Phinn S, Possingham H. 2006. Regional patterns of**  
286 **agricultural land use and deforestation in Colombia. *Agric Ecosyst Environ*. 114(2-**  
287 **4): 369–386.**
- 288 **Fiorillo BF, Faria CS, Silva BR, Martins M. 2018. Anurans from preserved and**  
289 **disturbed areas of Atlantic Forest in the region of Etá Farm, municipality of Sete**  
290 **Barras, state of São Paulo, Brazil. *Biota Neotrop*. 18(4): 1–15.**
- 291 **Fiorillo BF, Nali RC, Prado PCA. 2019. Habitat use and reproductive activity of**  
292 **anurans from a Cerrado area in Minas Gerais state, southeastern Brazil. *Herpetol***  
293 **Notes**. 12: 565–575.
- 294 **Frost DR. 2020. Amphibian species of the World 6.0. New York (NY): American**  
295 **Museum of Natural History. an Online Reference; [cited 2020 Apr 25]. Available**  
296 **from: <https://amphibiansoftheworld.amnh.org>**

- 297 **Garcia-Ulloa J, Sloan S, Pacheco P, Ghazoul J, Koh LP. 2012. Lowering**  
298 **environmental costs of oil-palm expansion in Colombia. Conserv Lett. 5(5): 366–**  
299 **375.**
- 300 **Guo Q. 2000. Climate change and biodiversity conservation in Great Plains**  
301 **agroecosystems. Global Environ Chang. 10(4): 289–298.**
- 302 **Haddad CF, Martins M. 1994. Four species of Brazilian poison frogs related to**  
303 **Epipedobates pictus (Dendrobatidae): taxonomy and natural history observations.**  
304 **Herpetologica. 282–295.**
- 305 **Haddad CFB, Prado CPA. 2005. Reproductive Modes in Frogs and Their**  
306 **Unexpected Diversity in the Atlantic Forest of Brazil. Bioscience 55: 207–217.**
- 307 **Hansen MC, Stehmanb SV, Potapov PV. 2010. Quantification of global gross forest**  
308 **cover loss. PNAS 107: 8650–8655.**
- 309 **Hansen MC, Potapov PV, Moore R, Hancher M, Turubanova SA, Tyukavina A,**  
310 **Thau D, Stehman SV, Goetz SJ, Loverland TR, et al. 2013. High-Resolution Global**  
311 **Maps of 21st-Century Forest Cover Change. Science 342: 850–853.**
- 312 **Heyer WR, Bellin MS. 1973. Ecological notes on five sympatric Leptodactylus**  
313 **(Amphibia, Leptodactylidae) from Ecuador. Herpetologica. 66–72.**
- 314 **IUCN SSC Amphibian Specialist Group. 2019. *Leptodactylus mystaceus*. The IUCN**  
315 **Red List of Threatened Species 2010: e.T57146A11591629. an Online reference;**  
316 **[cited 2020 Apr 25]. Available from: <https://dx.doi.org/10.2305/IUCN.UK.2010->**  
317 **2.RLTS.T57146A11591629.en.**

- 318 **Izac AMN, Sanchez PA. 2001. Towards a natural resource management paradigm**  
319 **for international agriculture: the example of agroforestry research. Agric Syst.**  
320 **69(1-2): 5–25.**
- 321 **Jose S. 2009. Agroforestry for ecosystem services and environmental benefits: an**  
322 **overview. Agrofor Syst. 76(1): 1–10.**
- 323 **Jose S. 2012. Agroforestry for conserving and enhancing biodiversity. Agrofor Syst.**  
324 **85(1): 1-8.**
- 325 **Lavelle P, Blanchart E, Martin A, Spain AV, Martin S. 1992. The impact of soil**  
326 **fauna on the properties of soils in the humid tropics. In: Myths and science of soils**  
327 **of the tropics. Sanchez PA, Lal R, editors. Madison, Wis. p 157–185.**
- 328 **Lin BB. 2007. Agroforestry management as an adaptive strategy against potential**  
329 **microclimate extremes in coffee agriculture. Agric For Meteorol. 144(1-2): 85–94.**
- 330 **Lips KR, Burrowes PA, Mendelson IIIJR, Parra-Olea G. 2005. Amphibian Declines**  
331 **in Latin America: Widespread Population Declines, Extinctions, and Impacts 1.**  
332 **Biotropica. 37(2): 163–165.**
- 333 **Lötters S, Mutschmann F. 2007. Poison Frogs: Biology, Species & Captive Care.**  
334 **Edition Chimaira.**
- 335 **Manly BF. 1994. 10 Ecological statistics. Handbook of statistics. 12: 307–376.**
- 336 **Marvier M, Kareiva P, Neubert MG. 2004. Habitat destruction, fragmentation, and**  
337 **disturbance promote invasion by habitat generalists in a multispecies**  
338 **metapopulation. Risk Anal. 24(4): 869–878.**

339 **Mboukou-Kimbatsa IMC, Bernhard-Reversat F, Loumeto JJ. 1998. Change in soil**  
340 **macrofauna and vegetation when fast- growing trees are planted on savanna soils.**  
341 **For Ecol Manage 110:1–12.**

342 **Miranda DB, Albuquerque S, Turci LCB, Bernarde OS. 2015. Richness, breeding**  
343 **environments and calling activity of the anurofauna of the lower moa river forest,**  
344 **state of Acre, Brazil. Zoologia 32: 93–108.**

345 **Myers N, Mittermeier RA, Mittermeier CG, da Fonseca GAB, Kent J. 2000.**  
346 **Biodiversity hotspots for conservation priorities. Nature 403: 853–858.**

347 **Palacios CP, Agüero B, Simonetti JA. 2013. Agroforestry systems as habitat for**  
348 **herpetofauna: is there supporting evidence?. Agrofor Syst. 87(3): 517-523.**

349 **Perfecto I, Vandermeer J. 2008 Biodiversity conservation in tropical**  
350 **agroecosystems: a new conservation paradigm. Year Ecol Conserv Biol. 1134: 173–**  
351 **200.**

352 **Ricaurte LF, Wantzen KM, Agudelo E, Betancourt B, Jokela J. 2014. Participatory**  
353 **rural appraisal of ecosystem services of wetlands in the Amazonian Piedmont of**  
354 **Colombia: elements for a sustainable management concept. Wetl Ecol Manag. 22:**  
355 **343–361.**

356 **Rodríguez LO, Duellman WE. 1994. Guide to the frogs of the Iquitos Region,**  
357 **Amazonian Peru. Univ Kans publ Mus Nat. 23.**

358 **Rojas RR, Carvalho VT, Ávila RW, Farias IP, Gordo M, Hrbek T. 2015. Two new**  
359 **species of *Amazophrynella* (Amphibia: Anura: Bufonidae) from Loreto, Peru.**  
360 **Zootaxa 3946: 79–103.**



- 361 **Rueda-Almonacid JV, Lynch JD, Amézquita A. 2004. Libro rojo de los anfibios de**  
362 **Colombia. Conservación Internacional, Colombia.**
- 363 **Ruf F, Schroth, G. 2004. Chocolate Forests and Monocultures: A Historical Review**  
364 **of Cacao Growing and Its Conflicting Role in Tropical Deforestation and Forest**  
365 **Conservation. In: Agroforestry and Biodiversity Conservation in Tropical**  
366 **Landscapes. Schroth G, da Fonseca, GAB, Harvey, CA, Gascon C, Vasconcelos HL,**  
367 **Izac AMN, editors. Washington, Island Press. p. 107–134.**
- 368 **Sawaya RJ, Marques OA. V, Martins M. 2008. Composição e história natural das**  
369 **serpentes de Cerrado de Itirapina, São Paulo, sudeste do Brasil. Biota Neotrop.**  
370 **8(2): 127–149.**
- 371 **Schroth G, Harvey CA. 2007. Biodiversity conservation in Cacao production**  
372 **landscapes: an overview. Biodiver Conserv. 16(8): 2237–2244.**
- 373 **Silva FR, Rossa-Feres DC. 2011. Influence of terrestrial habitat isolation on the**  
374 **diversity and temporal distribution of anurans in an agricultural landscape. J Trop**  
375 **Ecol. 27(3): 327–331.**
- 376 **Sneath PH, Sokal RR. 1973. Numerical Taxonomy: the Principles and Practice of**  
377 **Numerical Classification, WH. Freeman and Company, San Francisco.**
- 378 **Somarriba E, Harvey CA, Samper M, Anthony F, Gonzy F, GonStaver C, Rice RA.**  
379 **2004. Biodiversity Conservation in Neotropical Coffee (*Coffea arabica*) Plantations.**  
380 **In: Schroth G, da Fonseca GAB, Harvey CA, Gascon C, Vasconcelos HL, Izac**  
381 **AMN, editors, Island Press. 198–226 p.**

- 382 **Teixeira RL, Ferreira RB, Silva-Soares T, Mageski MM, Pertel W, Rödder D, de**  
383 **Barros EH, Engler JO. 2015. Anuran community of a cocoa agroecosystem in**  
384 **southeastern Brazil. Salamandra 51(2): 1–4.**
- 385 **Urbina Cardona JN, Pérez-Torres J. 2002. Dinámica y preferencias de microhábitat**  
386 **en dos especies del género *Eleutherodactylus* (Anura: Leptodactylidae) de bosque**  
387 **andino. In Memorias del Congreso Mundial de Páramos. Gente Nueva, Bogotá,**  
388 **Colombia. pp. 278-288.**
- 389 **Valdujo PH, Carnaval ACOQ, Graham CH. 2013. Environmental correlates of**  
390 **anuran beta diversity in the Brazilian Cerrado. Ecography 36(6): 708–717.**
- 391 **Vásquez D, Correa C, Pastenes L, Palma RE, Méndez MA. 2013. Low**  
392 **phylogeographic structure of *Rhinella arunco* (Anura: Bufonidae), an endemic**  
393 **amphibian from the Chilean Mediterranean hotspot. Zool Stud. 52(1): 35.**
- 394 **Wanger TC, Iskandar DT, Motzke I, Brook BW, Sodhi NS, Clough Y, Tschardtke**  
395 **T. 2010. Effects of Land-Use Change on Community Composition of Tropical**  
396 **Amphibians and Reptiles in Sulawesi, Indonesia. Conserv Biol. 24(3): 795–802.**
- 397 **Yandi B, Carlos E, Gómez Díaz MA, Gómez Figueroa A, Velásquez Trujillo DA,**  
398 **Bolivar García W. 2016. Ensamblaje de anfibios presentes en un bosque seco y en**  
399 **sistemas productivos, Valle Medio del Magdalena, Victoria y La Dorada, Caldas,**  
400 **Colombia. Revista de Ciencias. 20(2): 81–93.**

402 **Legends for figures**

403 **Figure 1.** Ecoregions map of Colombia, showing the location of the Caquetá department in  
404 Colombia. Ecoregions were adapted from Dinerstein et al. (2017). Red star indicates study  
405 area location.

406 **Figure 2.** A) Distribution of abundances of anurans sampled. (absolute numbers are shown  
407 above each bar) and B) proportion of the abundance in each agroforestry system sampled at  
408 Amazonian Research Center Macagual, Department of Caquetá, Colombia.

409 **Figure 3.** Venn diagram of the intersections between the composition of each of the three  
410 agroforestry systems sampled (Achapo, Cacao, and relictual forests). Aand: *Adenomera*  
411 *andreae*, Ahah: *Ameerega hahneli*, Amar: *Allobates marchesianus*, Amin: *Amazophrynella*  
412 *minuta*, Bcin: *Boana cinerascens*, Blan: *Boana lanciformis*, Blan: *Boana punctata*, Dpar:  
413 *Dendropsophus parviceps*, Llep: *Leptodactylus leptodactyloides*, Lmys: *Leptodactylus*  
414 *mystaceus*, Lpen: *Leptodactylus pentadactylus*, Lwag: *Leptodactylus wagneri*, Llin:  
415 *Lithodytes lineatus*, Oplan: *Osteocephalus planiceps*, Palt: *Pristimantis altamazonicus*, Pcon:  
416 *Pristimantis conspicillatus*, Sgar: *Scinax garbei*, Srub: *Scinax ruber*, Rmar: *Rhinella*  
417 *margaritifera*, Rmri: *Rhinella marina*. Obs: when more than 90% of given species was found  
418 in a single system (e.g. *Boana cinerascens*), it was considered as exclusive in the diagram.

419 **Figure 4.** Sampling coverage curves for each agroforestry systems. Black: Relictual forest,  
420 Red: Cacao, Green: Achapo.

421 **Figure 5.** Principal coordinate analysis (PCoA) of anuran abundance, for each species  
422 recorded at Amazonian Research Center Macagual, Department of Caquetá, Colombia.

423

424

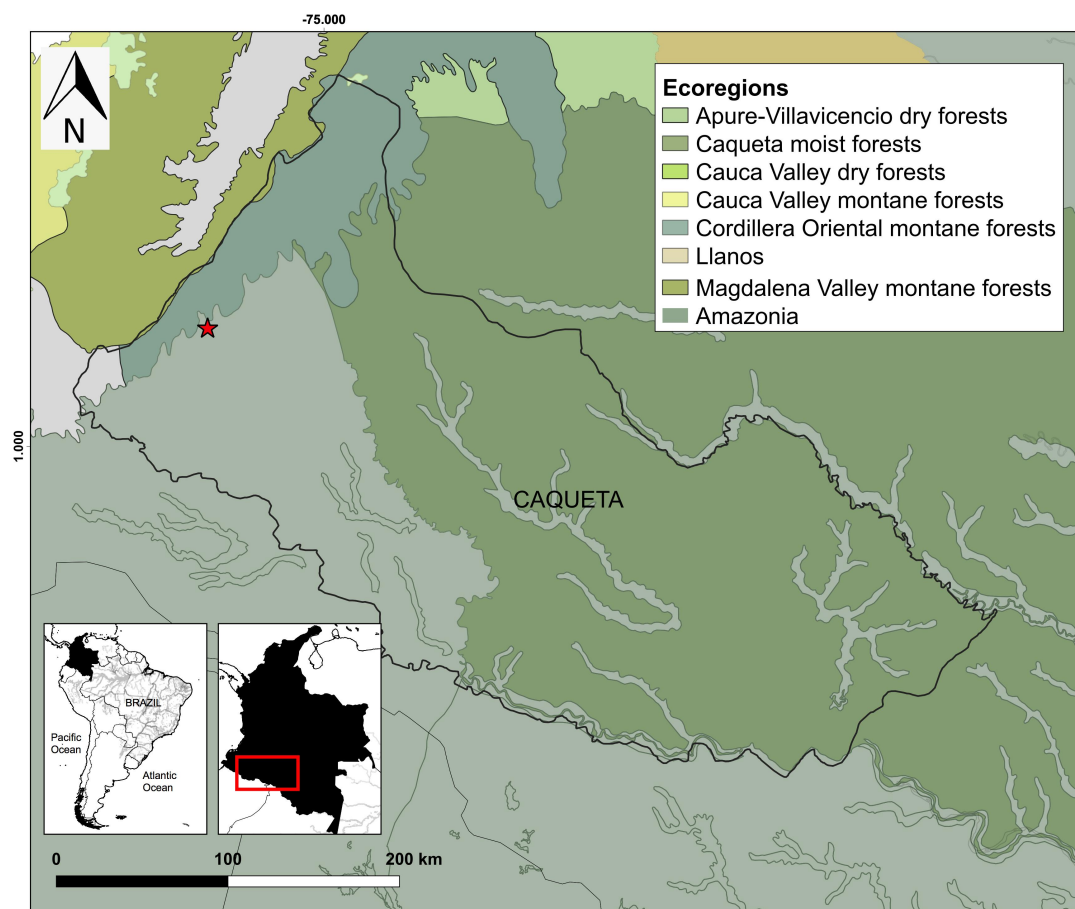

425

426 **Figure 1.** Ecoregions map of Colombia, showing the location of the Caquetá department in  
427 Colombia. Ecoregions were adapted from Dinerstein et al. (2017). Red star indicates study  
428 area location.

429

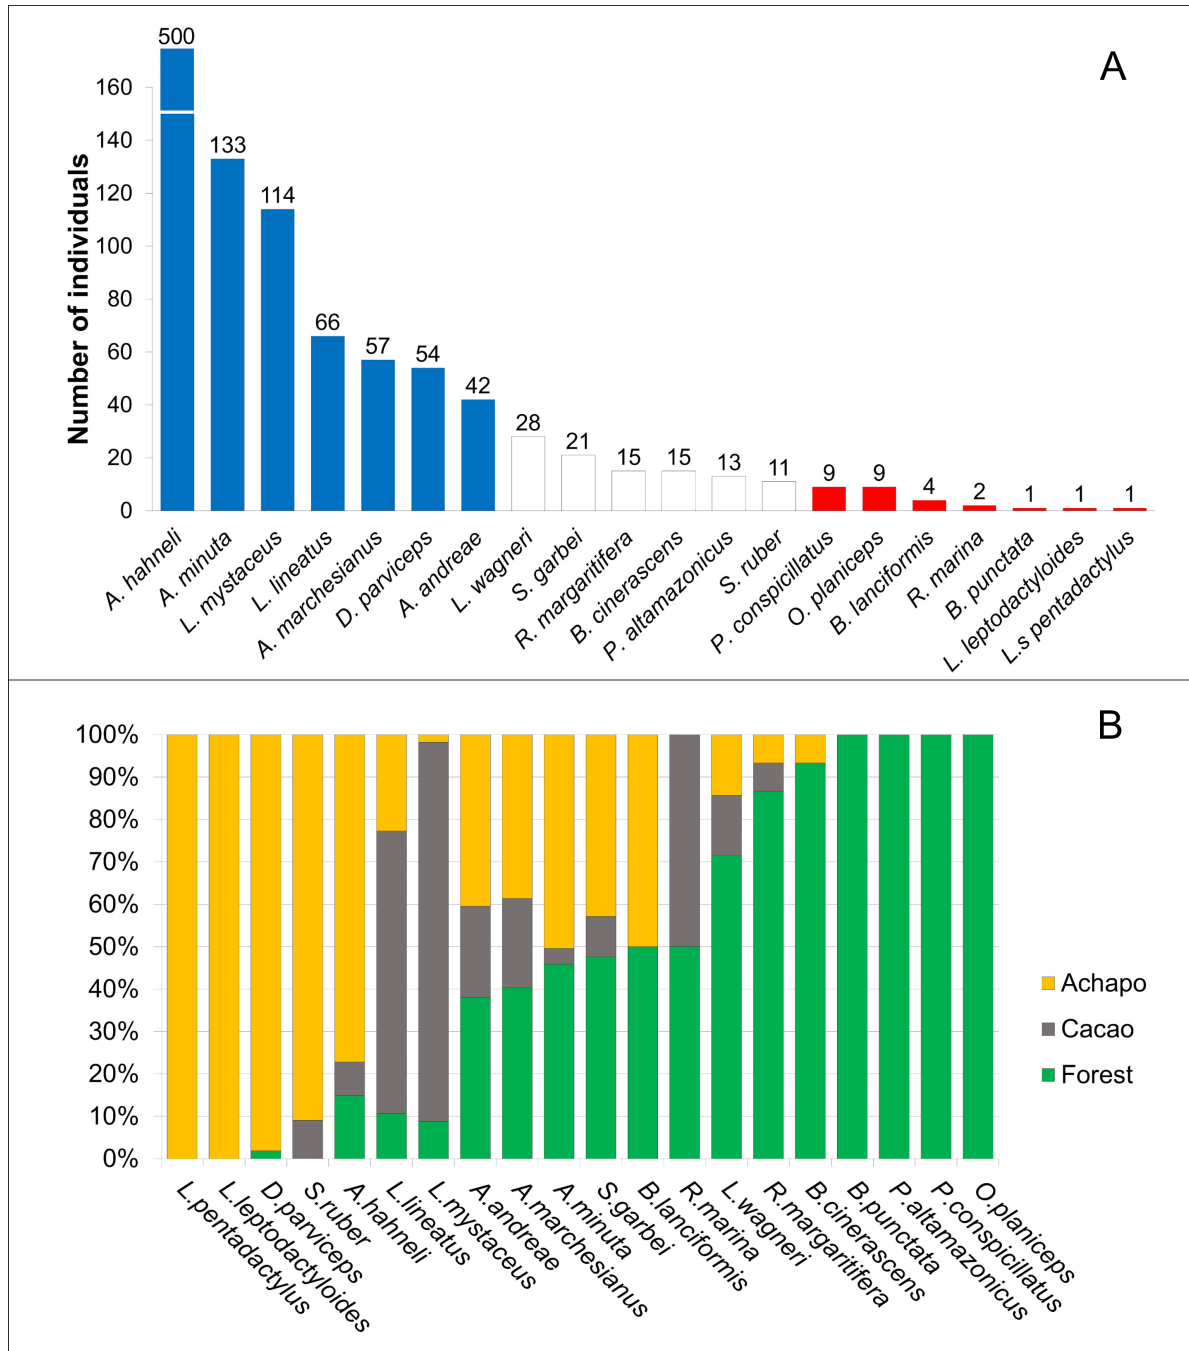

430

431 **Figure 2.** A) Distribution of abundances of anurans sampled. (absolute numbers are shown

432 above each bar) and B) proportion of the abundance in each agroforestry system sampled at

433 Amazonian Research Center Macagual, Department of Caquetá, Colombia.

434

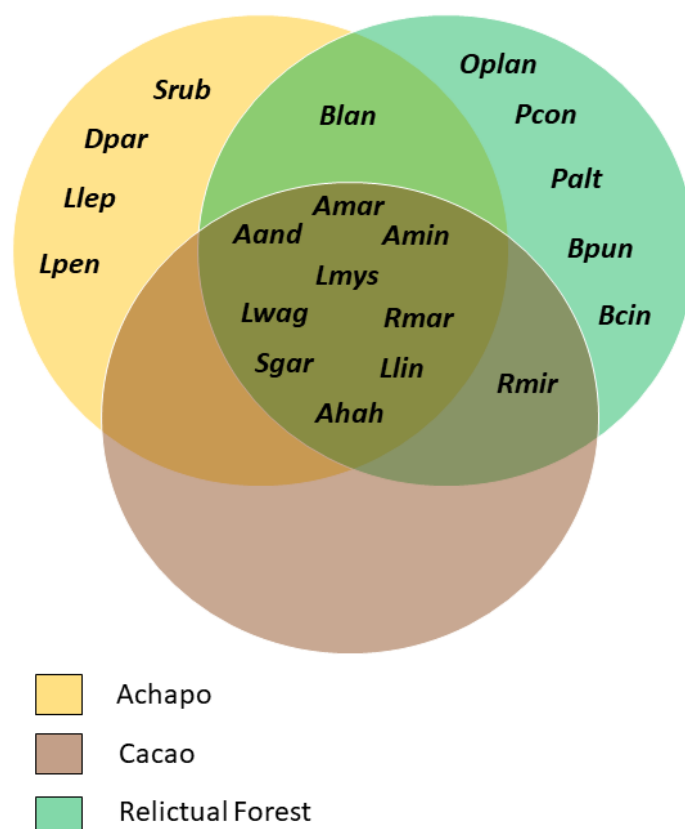

435

436 **Figure 3.** Venn diagram of the intersections between the composition of each of the three  
 437 agroforestry systems sampled (Achapo, Cacao, and relictual forests). Aand: *Adenomera*  
 438 *andreae*, Ahah: *Ameerega hahneli*, Amar: *Allobates marchesianus*, Amin: *Amazophrynella*  
 439 *minuta*, Bcin: *Boana cinerascens*, Blan: *Boana lanciformis*, Blan: *Boana punctata*, Dpar:  
 440 *Dendropsophus parviceps*, Llep: *Leptodactylus leptodactyloides*, Lmys: *Leptodactylus*  
 441 *mystaceus*, Lpen: *Leptodactylus pentadactylus*, Lwag: *Leptodactylus wagneri*, Llin:  
 442 *Lithodytes lineatus*, Oplan: *Osteocephalus planiceps*, Palt: *Pristimantis altamazonicus*, Pcon:  
 443 *Pristimantis conspicillatus*, Sgar: *Scinax garbei*, Srub: *Scinax ruber*, Rmar: *Rhinella*  
 444 *margaritifera*, Rmri: *Rhinella marina*. Obs: when more than 90% of given species was found  
 445 in a single system (e.g. *Boana cinerascens*), it was considered as exclusive in the diagram.

446

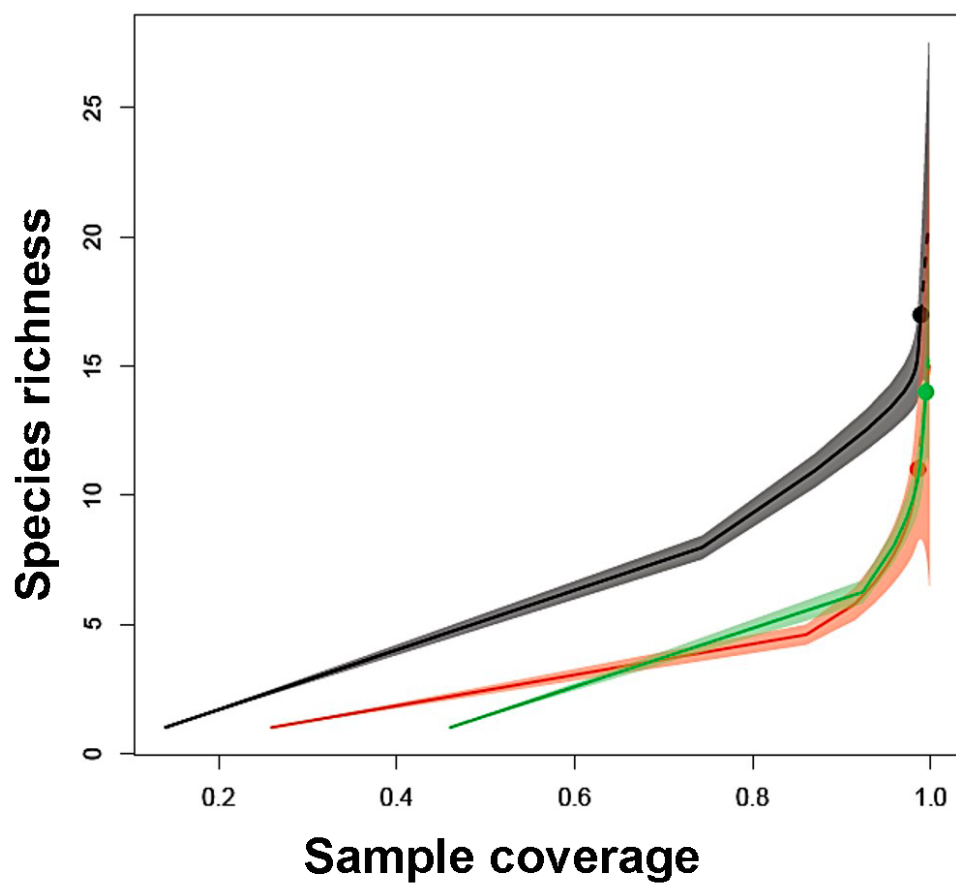

447

448 **Figure 4.** Sampling coverage curves for each agroforestry systems. Black: relictual forest,

449 Red: Cacao, Green: Achapo.

450

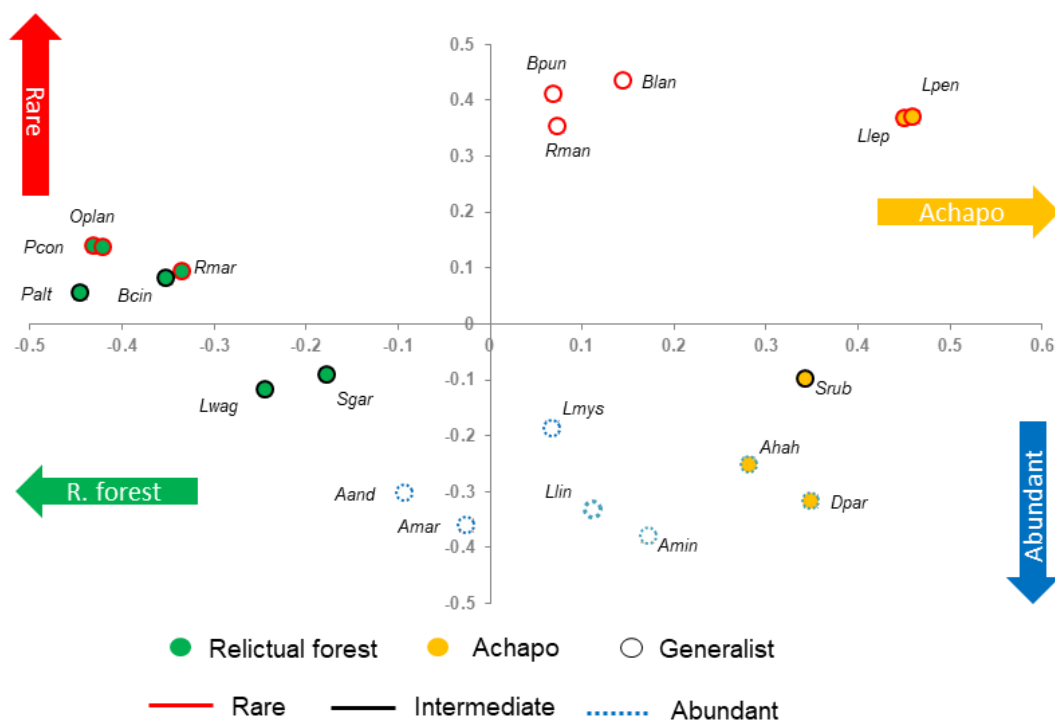

451

452 **Figure 5.** Principal coordinate analysis (PCoA) of anuran abundance, for each species

453 recorded at Amazonian Research Center Macagual, Department of Caquetá, Colombia.

454

455

456



457 **List of tables**

458 **Table 1.** Description of the sampled agroforestry systems in Amazon foothills, Department of  
459 Caquetá, Colombia.

460 **Table 2.** Abundance of anuran species recorded in relictual forest, Achapo and Cacao  
461 systems in the Amazonian Piedmont, Department of Caquetá, Colombia.

462

463 **Table 1.** Description of the sampled agroforestry systems in Amazon foothills, Department of  
464 Caquetá, Colombia.

| Agroforestry system | Coordinates              | Elevation (m) | Vegetation                                                                                                                                                                                                                                                                                                                                                                                                                                     |
|---------------------|--------------------------|---------------|------------------------------------------------------------------------------------------------------------------------------------------------------------------------------------------------------------------------------------------------------------------------------------------------------------------------------------------------------------------------------------------------------------------------------------------------|
| Cacao               | 1.497578, -<br>75.664791 | 235           | Agrosystem composed mostly by fruit crops, such as Azara ( <i>Eugenia stipitata</i> ) and Cupuassu ( <i>Theobroma grandiflorum</i> ), and Peach Palm ( <i>Bactris gasipaes</i> ).                                                                                                                                                                                                                                                              |
| Achapo              | 1.500946, -<br>75.662211 | 240           | Agroforestry system composed mainly by timber species, such as: Abarco ( <i>Cariniana pyriformis</i> ), Azara ( <i>Eugenia stipitata</i> ), Bilibil ( <i>Guarea</i> sp.), Brazilian orchid tree ( <i>Bauhinia forficata</i> ), Common cedro ( <i>Cedrela odorata</i> ), Cupuassu ( <i>Theobroma grandiflorum</i> ), Pink poui ( <i>Tabebuia rose</i> ), Pink shower tree ( <i>Cassia grandis</i> ) and the rain tree ( <i>Samanea saman</i> ). |
| Relictual forest    | 1.497562, -<br>75.672103 | 243           | Forest remanent which has undergone certain transformation processes, due to deforestation for cattle breeding                                                                                                                                                                                                                                                                                                                                 |

465

466 **Table 2.** Abundance of anuran species recorded in Relictual forest, Achapo and Cacao  
 467 systems in the Amazonian Piedmont, Department of Caquetá, Colombia.

| FAMILY/SPECIES                        | Agroforestry System |        |       | Total |
|---------------------------------------|---------------------|--------|-------|-------|
|                                       | Relictual Forest    | Achapo | Cacao |       |
| <b>AROMOBATIDAE</b>                   |                     |        |       |       |
| <i>Allobates marchesianus</i>         | 23                  | 22     | 12    | 57    |
| <b>BUFONIDAE</b>                      |                     |        |       |       |
| <i>Amazophrynella minuta</i>          | 61                  | 67     | 5     | 133   |
| <i>Rhinella marina</i>                | 1                   | 0      | 1     | 2     |
| <i>Rhinella margaritifera</i>         | 13                  | 1      | 1     | 15    |
| <b>CRAUGASTORIDAE</b>                 |                     |        |       |       |
| <i>Pristimantis altamazonicus</i>     | 13                  | 0      | 0     | 13    |
| <i>Pristimantis conspicillatus</i>    | 9                   | 0      | 0     | 9     |
| <b>DENDROBATIDAE</b>                  |                     |        |       |       |
| <i>Ameerega hahneli</i>               | 74                  | 386    | 40    | 500   |
| <b>HYLIDAE</b>                        |                     |        |       |       |
| <i>Dendropsophus parviceps</i>        | 1                   | 53     | 0     | 54    |
| <i>Boana cinerascens</i>              | 14                  | 1      | 0     | 15    |
| <i>Boana lanciformis</i>              | 2                   | 2      | 0     | 4     |
| <i>Boana punctata</i>                 | 1                   | 0      | 0     | 1     |
| <i>Osteocephalus planiceps</i>        | 9                   | 0      | 0     | 9     |
| <i>Scinax garbei</i>                  | 10                  | 9      | 2     | 21    |
| <i>Scinax ruber</i>                   | 0                   | 10     | 1     | 11    |
| <b>LEPTODACTYLIDAE</b>                |                     |        |       |       |
| <i>Adenomera andreae</i>              | 16                  | 17     | 9     | 42    |
| <i>Leptodactylus leptodactyloides</i> | 0                   | 1      | 0     | 1     |
| <i>Leptodactylus mystaceus</i>        | 10                  | 2      | 102   | 114   |

|                              |            |            |            |             |
|------------------------------|------------|------------|------------|-------------|
| <i>Leptodactylus</i>         | 0          | 1          | 0          | 1           |
| <i>pentadactylus</i>         |            |            |            |             |
| <i>Leptodactylus wagneri</i> | 20         | 4          | 4          | 28          |
| <i>Lithodytes lineatus</i>   | 7          | 15         | 44         | 66          |
| <b>TOTAL</b>                 | <b>284</b> | <b>591</b> | <b>221</b> | <b>1096</b> |

---
